# Supplementary material for: Association of Cognitive Deficits with Sociodemographic Characteristics among Adults with Post-COVID Conditions: Findings from the United States Household Pulse Survey
Source: bioRxiv or medRxiv preprint supplement (doi:10.1101/2023.09.22.23295981), 2023-09-25
Supplement: Supplementary file [file media-1.pdf]

**Table S1.** Logistic regression analysis of associations between severe cognition deficit and acute COVID infection severity, referent to people never infected.

|                     | Univariate model  |         | Adjusted model    |         |
|---------------------|-------------------|---------|-------------------|---------|
|                     | OR (95% CI)       | p-value | OR (95% CI)       | p-value |
| <b>Asymptomatic</b> | 1.12 (0.99, 1.26) | 0.05    | 1.01 (0.91, 1.14) | 0.75    |
| <b>Mild</b>         | 1.46 (1.40, 1.52) | <0.0001 | 1.24 (1.19, 1.30) | <0.0001 |
| <b>Moderate</b>     | 1.49 (1.43, 1.55) | <0.0001 | 1.32 (1.26, 1.37) | <0.0001 |
| <b>Severe</b>       | 3.97 (3.78, 4.17) | <0.0001 | 3.07 (2.91, 3.22) | <0.0001 |

OR: odds ratio. Adjusted: model adjusted for age, gender, race/ethnicity, education, and region.

**Table S2.** Association between cognitive deficit and sociodemographic factors among long COVID patients

|                           | Severe Cognitive Deficit |        | OR (95% CI)       | p-value   |
|---------------------------|--------------------------|--------|-------------------|-----------|
|                           | Yes                      | No     |                   |           |
| <b>Gender at Birth, N</b> |                          |        |                   |           |
| Male                      | 1,738                    | 11,857 | 1.0               | Reference |
| Female                    | 4,945                    | 25,073 | 1.32 (1.25, 1.40) | <0.0001   |
| <b>Race/Ethnicity, N</b>  |                          |        |                   |           |
| Non-Hispanic White        | 4,932                    | 27,428 | 1.0               | Reference |
| Non-Hispanic Black        | 410                      | 2,436  | 0.85 (0.76, 0.95) | 0.003     |
| Non-Hispanic Asian        | 116                      | 1,069  | 0.65 (0.54, 0.80) | <0.0001   |
| Non-Hispanic, Multi-races | 445                      | 1,855  | 1.27 (1.14, 1.42) | <0.0001   |
| Hispanic                  | 780                      | 4,142  | 0.97 (0.89, 1.05) | 0.467     |
| <b>Age, N</b>             |                          |        |                   |           |
| 18-34                     | 1,494                    | 6,803  | 1.0               | Reference |
| 35-49                     | 2,272                    | 12,204 | 0.85 (0.80, 0.92) | <0.0001   |
| 50-64                     | 1,668                    | 11,414 | 0.65 (0.60, 0.71) | <0.0001   |
| 65 and above              | 1,249                    | 6,509  | 0.88 (0.81, 0.96) | 0.004     |
| <b>Education, N</b>       |                          |        |                   |           |
| High School and Below     | 1,153                    | 5,480  | 1.0               | Reference |
| Some College/Associate    | 3,037                    | 13,905 | 1.03 (0.96, 1.11) | 0.41      |
| Bachelor's degree         | 1,486                    | 9,867  | 0.72 (0.66, 0.78) | <0.0001   |
| Graduate degree           | 1,007                    | 7,678  | 0.63 (0.58, 0.69) | <0.0001   |
| <b>Region, N</b>          |                          |        |                   |           |
| Northeast                 | 800                      | 4,968  | 1.0               | Reference |
| South                     | 2,389                    | 11,990 | 1.21 (1.11, 1.32) | < 0.0001  |
| Midwest                   | 1,449                    | 8,452  | 1.01 (0.92, 1.11) | 0.88      |
| West                      | 2,045                    | 11,520 | 1.06 (0.97, 1.15) | 0.24      |

Odds ratios are calculated using adjusted logistic regression analyses that are controlled for the other categorical variables in the table.

**Table S3.** Prevalence of Cognitive Deficit Reported by Long COVID Patients in US States

| State                | Cognitive Deficit |      | %    | State          | Cognitive Deficit |      | %    |
|----------------------|-------------------|------|------|----------------|-------------------|------|------|
|                      | Yes               | No   |      |                | Yes               | No   |      |
| Alabama              | 127               | 612  | 17.2 | Alaska         | 98                | 546  | 15.2 |
| Arizona              | 167               | 1033 | 13.9 | Arkansas       | 142               | 629  | 18.4 |
| California           | 349               | 2306 | 13.2 | Colorado       | 182               | 964  | 15.9 |
| Connecticut          | 77                | 584  | 11.6 | Delaware       | 51                | 292  | 14.9 |
| District of Columbia | 53                | 291  | 15.4 | Florida        | 187               | 1070 | 14.9 |
| Georgia              | 159               | 875  | 15.4 | Hawaii         | 46                | 314  | 12.8 |
| Idaho                | 150               | 799  | 15.8 | Illinois       | 124               | 803  | 13.4 |
| Indiana              | 123               | 769  | 13.8 | Iowa           | 140               | 668  | 17.3 |
| Kansas               | 125               | 753  | 14.2 | Kentucky       | 155               | 635  | 19.6 |
| Louisiana            | 110               | 560  | 16.4 | Maine          | 58                | 318  | 15.4 |
| Maryland             | 93                | 655  | 12.4 | Massachusetts  | 120               | 809  | 12.9 |
| Michigan             | 170               | 1020 | 14.3 | Minnesota      | 127               | 783  | 14.0 |
| Mississippi          | 100               | 505  | 16.5 | Montana        | 136               | 726  | 15.8 |
| Montana              | 113               | 536  | 17.4 | Nebraska       | 118               | 683  | 14.7 |
| Nevada               | 98                | 594  | 14.2 | New Hampshire  | 80                | 521  | 13.3 |
| New Jersey           | 99                | 642  | 13.4 | New Mexico     | 126               | 683  | 15.6 |
| New York             | 115               | 658  | 14.9 | North Carolina | 114               | 600  | 16.0 |
| North Dakota         | 77                | 423  | 15.4 | Ohio           | 126               | 639  | 16.5 |
| Oklahoma             | 192               | 805  | 19.3 | Oregon         | 189               | 865  | 17.9 |
| Pennsylvania         | 144               | 843  | 14.6 | Rhode Island   | 52                | 306  | 14.5 |
| South Carolina       | 126               | 638  | 16.5 | South Dakota   | 84                | 510  | 14.1 |
| Tennessee            | 161               | 789  | 16.9 | Texas          | 340               | 1770 | 16.1 |
| Utah                 | 202               | 1114 | 15.3 | Vermont        | 55                | 287  | 16.1 |
| Virginia             | 151               | 752  | 16.7 | Washington     | 218               | 1251 | 14.8 |
| West Virginia        | 128               | 512  | 20.0 | Wisconsin      | 99                | 675  | 12.8 |
| Wyoming              | 109               | 515  | 17.5 |                |                   |      |      |

Numbers in % indicate the percentages of long COVID patients reporting severe cognitive deficits in each US state.

**Table S4.** Sociodemographic characteristics of long COVID patients in CT, MD, KY and WV States

|                               | <b>CT</b>      | <b>MD</b>     | <b>KY</b>      | <b>WV</b>      | <b>p-value</b> |
|-------------------------------|----------------|---------------|----------------|----------------|----------------|
|                               | <b>N = 661</b> | <b>N= 748</b> | <b>N = 790</b> | <b>N = 640</b> |                |
| <b>Gender at Birth, N (%)</b> |                |               |                |                | 0.89           |
| Male                          | 193 (29.2)     | 224 (29.9)    | 224 (28.4)     | 182 (28.4)     |                |
| Female                        | 468 (70.8)     | 524 (70.1)    | 566 (71.6)     | 458 (71.6)     |                |
| <b>Race/Ethnicity, N (%)</b>  |                |               |                |                | < 0.0001       |
| Non-Hispanic White            | 467 (70.7)     | 446 (59.6)    | 708 (89.6)     | 592 (92.5)     |                |
| Non-Hispanic Black            | 49 (7.4)       | 164 (21.9)    | 26 (3.3)       | 13 (2.0)       |                |
| Non-Hispanic Asian            | 15 (2.3)       | 27 (3.6)      | 8 (1.0)        | 6 (0.9)        |                |
| Non-Hispanic, Multi-races     | 22 (3.3)       | 32 (4.3)      | 25 (3.2)       | 13 (2.0)       |                |
| Hispanic                      | 108 (16.3)     | 79 (10.6)     | 23 (2.9)       | 16 (2.5)       |                |
| <b>Age, N (%)</b>             |                |               |                |                | 0.23           |
| 18-34                         | 123 (18.6)     | 122 (16.3)    | 154 (19.5)     | 95 (14.8)      |                |
| 35-49                         | 230 (34.8)     | 257 (34.4)    | 246 (31.1)     | 221 (34.5)     |                |
| 50-64                         | 209 (31.6)     | 246 (32.9)    | 246 (31.1)     | 223 (34.8)     |                |
| 65 and above                  | 99 (15.0)      | 123 (16.4)    | 144 (18.2)     | 101 (15.8)     |                |
| <b>Education, N (%)</b>       |                |               |                |                | < 0.0001       |
| High School and Below         | 112 (16.9)     | 102 (13.6)    | 147 (18.6)     | 154 (24.1)     |                |
| Some College/Associate        | 229 (34.6)     | 213 (28.5)    | 326 (41.3)     | 254 (39.7)     |                |
| Bachelor's degree             | 175 (26.5)     | 202 (27.0)    | 176 (22.3)     | 129 (20.2)     |                |
| Graduate degree               | 145 (21.9)     | 231 (30.9)    | 141 (17.8)     | 103 (16.1)     |                |

N represents the total number of long COVID patients in each of the four states. The numbers inside the parenthesis indicate the percentages of long COVID patients in each sociodemographic group. P-value calculation was based on the Chi-Squared test.
